# Supplementary material
Source: publisher site journal article supplement (https://www.dovepress.com/article/353286)
Supplement: Supplementary file 1 [file get_supplementary_file.php]

**A semi-structured interview guide used to explore the lived experience and risk reduction behaviors among sero-negative discordant male partners living with HIV-positive women in Addis Ababa, Ethiopia, 2019.**

Title: Lived experience and risk reduction behaviors among sero-negative discordant male partners living with HIV-positive women in Addis Ababa, Ethiopia, 2019; a qualitative phenomenological study.

**Consent form:**

My name is ----------------------------------. I am a lecturer at Addis Ababa University, College of Health Sciences, School of Nursing, and Midwifery. I would like to talk to you related to the discordant result. Since I am conducting a study on lived experience and risk reduction behaviors among sero-negative discordant male partners living with HIV-positive women. The study aims to explore the lived experience and risk reduction behaviors of sero-negative male partners living with the discordant result. You may play your role for the benefit of a discordant couple by participating in this study.

The result of the study will be important to enhance the survival time of a negative partner in a discordant couple by assessing risk reduction behaviors. Explored lived challenges are also helpful for future life enhancement of seronegative partners living with the discordant result. Moreover, the result is also expected to provide a recommendation to stakeholders working on HIV prevention and follow-up strategies of HIV discordant couples. By participating, you will contribute to improving the care given to discordant couples. Any information you provide will be kept confidential. Your name will not appear on the interview guide. Any information you provide will not be used against you. Your responses will not bring any harm to you and will not affect your job. I can assure you that the publication of anonymized responses has no harm on you.

If you decide to participate in the study, I will interview you for 40 minutes.

You are free to decide to participate, not participate or withdraw in between.

Are there any questions about what I have just explained?

Are you willing to participate in this interview?

__________________ __________________ __________

Interviewee Witness Date

Interviewer name: ___________________________ Phone no: _____________

Identification code: __________________________ Date of interview: ______

Start Time: __________________ End Time: **_________________**

| Part I: Socio-demographic information | | | |
| --- | --- | --- | --- |
| 1. How old are you (age in completed years)? _________________ 2. What is your occupation? ______________________________ 3. What is your Religion? ________________________________ 4. What is the highest educational level you completed? _________________ 5. How much is your average house monthly income? (Ethiopian birr) __________ 6. Date of diagnosis as discordant? _________________________ 7. Duration since diagnosis as discordant ___________________ | | | |
| Part II: How participants understand the discordant result | | | |
| No | Questions | Note Sheet | Remark |
| 01 | How do you understand discordant results in a couple? |  |  |
| 02 | Would you explain how discordant results can happen in a couple? |  |  |
| 03 | What is your feeling about living with discordant status? |  |  |
|  | Part III: Challenges experienced due to their discordant status | | |
| 04 | Did you experience challenges associated with discordant results?   - If yes, could you describe the challenges you faced? - Probe on:   - Scio-economic-related challenges?   - Psychosocial-related challenges?   - Marital relation-related challenges?   - Sexuality-related challenges? |  |  |
| 05 | How do you explain the challenges related to living with discordancy results? |  |  |
| 06 | How do you describe the service you get from the health institution? |  |  |
|  | Part IV: Risk reduction behaviors | | |
| 07 | How do you understand risk reduction behaviors related to discordant results? |  |  |
| 08 | Could you tell me risky behaviors that increase the chance of virus transmission? |  |  |
| 09 | What measures do you take to prevent the transmission of the virus?  Probe on:   - Condom use (reason to use/ not use) - Personalized use of sharp material? - Safe sex practice? - STI (what it, association with seroconversion & prevention method)? |  |  |
| 010 | Did your wife take ART drugs properly, how do you support?   - Tell me the importance of ART to minimize the risk of transmission? |  |  |
| 011 | Could you tell me your habit of substance use?  Probe on:   - Types of substance? - Substance dependency? - History of intoxication problems? |  |  |
| 012 | Could you tell me about the follow-up/checkup you have in the health institution? |  |  |
|  | Is there anything more you would like to add? Reflection/Comment/ Question? |  |  |

Thanks for participating. Have a great day
